# Supplementary material for: Selection of DNA aptamers for sensing drugs treating eye disease: atropine and timolol maleate
Source: Royal Society of Chemistry journal article supplement (doi:10.1039/d4sd00223g), 2024-01-01
Supplement: d4sd00223g1.xlsx [file d4sd00223g1.xlsx]

## Sheet: Figure 2A ThT assay
Target (μM)	Set 1	Set 2	Set 3
0	1	0.992432	0.99909
0.5	0.972189	0.988097	0.989393
1	0.873035	0.920521	0.870078
2	0.801052	0.88817	0.83779
3	0.644832	0.657542	0.650616
5	0.46477	0.472144	0.462441
7	0.38082	0.407124	0.39029
10	0.332041	0.293338	0.314027
12	0.306677	0.267384	0.28359
15	0.2899	0.260945	0.277303
20	0.245353	0.257815	0.245192
25	0.248128	0.241688	0.244969

## Sheet: Figure 2A_LOD
Target (μM)	Set 1	Set 2	Set 3
0	1	0.992432	0.99909
0.5	0.972189	0.988097	0.989393
1	0.873035	0.920521	0.870078
2	0.801052	0.88817	0.83779
3	0.644832	0.657542	0.650616
5	0.46477	0.472144	0.462441

## Sheet: Figure 2B Themogram
Time (Second)	μcal/sec
2	0.02393
4	0.02905
6	0.0235
8	0.01331
10	0.00321
12	-0.00418
14	-0.00395
16	0.000265177
18	0.01062
20	0.01637
22	0.01333
24	0.00645
26	-0.000791198
28	-0.00375
30	-0.00712
32	-0.00746
34	-0.00641
36	-0.00121
38	0.00498
40	0.01333
42	0.01594
44	0.0159
46	0.01421
48	0.01372
50	0.00943
52	-0.00156
54	-0.00672
56	-0.00708
58	-0.00638
60	-0.0058
62	-0.00612
64	-0.00338
66	0.00189
68	0.00155
70	0.00105
72	0.00326
74	0.00374
76	0.00478
78	0.01337
80	0.02237
82	0.02517
84	0.02546
86	0.02251
88	0.02088
90	0.02047
92	0.02079
94	0.01856
96	0.00869
98	-0.00481
100	-0.01054
102	-0.00975
104	-0.00474
106	-0.000320199
108	0.0072
110	0.01584
112	0.01673
114	0.01488
116	0.01493
118	0.01246
120	0.00597
122	0.0002498
124	-0.00186
126	-0.0059
128	-0.01236
130	-0.01234
132	-0.00609
134	0.00537
136	0.01987
138	0.03103
140	0.03684
142	0.03413
144	0.02618
146	0.01816
148	0.0162
150	0.01875
152	0.01927
154	0.02255
156	0.02577
158	0.02583
160	0.02855
162	0.03057
164	0.03033
166	0.02374
168	0.01819
170	0.01664
172	0.01562
174	0.01286
176	0.01339
178	0.01326
180	0.01486
182	0.01986
184	0.02564
186	0.02837
188	0.02575
190	0.01468
192	0.00547
194	0.00875
196	0.01557
198	0.02052
200	0.02971
202	0.03488
204	0.02518
206	0.01242
208	0.00241
210	0.00427
212	0.00972
214	0.00961
216	0.01308
218	0.01132
220	0.0106
222	0.01056
224	0.01123
226	0.01036
228	0.00928
230	0.01007
232	0.01331
234	0.01901
236	0.02116
238	0.02239
240	0.02144
242	0.0225
244	0.02241
246	0.01917
248	0.01671
250	0.0122
252	0.000620924
254	-0.0086
256	-0.00792
258	-0.00333
260	3.44237e-05
262	-0.0017
264	-0.00579
266	-0.00544
268	0.00513
270	0.01118
272	0.00407
274	-0.00301
276	-0.00641
278	-0.00726
280	-0.00479
282	-0.00214
284	-0.00221
286	-0.00168
288	-0.000276827
290	0.00367
292	0.00664
294	0.00629
296	0.00464
298	0.00452
300	0.01526
302	0.02271
304	0.02165
306	0.01525
308	0.0154
310	0.02205
312	0.02048
314	0.01434
316	0.00509
318	-0.00491
320	-0.01103
322	-0.01329
324	-0.009
326	0.00234
328	0.00218
330	-0.00575
332	-0.00871
334	-0.00233
336	0.00413
338	-0.00168
340	-0.00826
342	-0.00656
344	-0.000843327
346	-0.00481
348	-0.01209
350	-0.01353
352	-0.01387
354	-0.01004
356	-0.00425
358	-0.00698
360	-0.009
362	-0.00826
364	-0.00113
366	0.00299
368	-0.00104
370	-0.00628
372	-0.00759
374	-0.00795
376	-0.00647
378	-0.00259
380	0.0047
382	0.0072
384	0.00338
386	-0.00124
388	-0.00582
390	-0.00646
392	-0.00691
394	-0.00442
396	-0.00217
398	-0.00234
400	-0.00348
402	-0.00325
404	-0.00164
406	0.00288
408	0.00407
410	0.00258
412	0.000994922
414	0.000213047
416	0.00124
418	0.00769
420	0.01454
422	0.01186
424	0.00811
426	0.01628
428	0.02038
430	0.01498
432	-0.000128874
434	-0.01264
436	-0.01854
438	-0.01801
440	-0.0148
442	-0.01132
444	-0.00333
446	0.00351
448	0.00505
450	0.00163
452	-0.00294
454	-0.00838
456	-0.01136
458	-0.01515
460	-0.02372
462	-0.02836
464	-0.02576
466	-0.01914
468	-0.01409
470	-0.01917
472	-0.02561
474	-0.02441
476	-0.01839
478	-0.01878
480	-0.02822
482	-0.03522
484	-0.04026
486	-0.04756
488	-0.09428
490	-0.17957
492	-0.28612
494	-0.34876
496	-0.38599
498	-0.43691
500	-0.49873
502	-0.55095
504	-0.57844
506	-0.56878
508	-0.52823
510	-0.47206
512	-0.4044
514	-0.33707
516	-0.27139
518	-0.20159
520	-0.13104
522	-0.06316
524	-0.00754
526	0.03863
528	0.0797
530	0.11662
532	0.14711
534	0.17079
536	0.19058
538	0.20831
540	0.22113
542	0.22391
544	0.22951
546	0.24326
548	0.25578
550	0.2623
552	0.26481
554	0.2698
556	0.27352
558	0.27717
560	0.28046
562	0.28223
564	0.28433
566	0.28386
568	0.28145
570	0.28469
572	0.29377
574	0.29458
576	0.28689
578	0.28098
580	0.28717
582	0.29297
584	0.28898
586	0.28244
588	0.27813
590	0.27415
592	0.2779
594	0.27935
596	0.28193
598	0.28277
600	0.27309
602	0.26189
604	0.25724
606	0.25945
608	0.25998
610	0.25641
612	0.25408
614	0.25271
616	0.2541
618	0.24763
620	0.24281
622	0.24394
624	0.24771
626	0.24716
628	0.24163
630	0.23924
632	0.24135
634	0.23862
636	0.2282
638	0.21996
640	0.22265
642	0.22827
644	0.2305
646	0.22239
648	0.21142
650	0.20658
652	0.20639
654	0.20668
656	0.20782
658	0.2075
660	0.20257
662	0.19377
664	0.19519
666	0.20481
668	0.20579
670	0.19839
672	0.18584
674	0.17466
676	0.17206
678	0.17087
680	0.166
682	0.16138
684	0.15386
686	0.14967
688	0.14817
690	0.15049
692	0.15581
694	0.15871
696	0.15792
698	0.15042
700	0.14002
702	0.13372
704	0.13272
706	0.13566
708	0.13443
710	0.13461
712	0.13679
714	0.13467
716	0.13404
718	0.13561
720	0.12922
722	0.12461
724	0.12523
726	0.11444
728	0.10184
730	0.09932
732	0.09713
734	0.09623
736	0.09764
738	0.09956
740	0.09498
742	0.08243
744	0.07547
746	0.07243
748	0.0743
750	0.07489
752	0.07244
754	0.06993
756	0.07332
758	0.07469
760	0.07488
762	0.07554
764	0.07652
766	0.07105
768	0.06187
770	0.05576
772	0.05277
774	0.05576
776	0.05517
778	0.05232
780	0.04799
782	0.04252
784	0.04046
786	0.03709
788	0.03557
790	0.03596
792	0.03909
794	0.03861
796	0.03441
798	0.0267
800	0.02484
802	0.02479
804	0.02523
806	0.023
808	0.0166
810	0.01005
812	0.00676
814	0.00815
816	0.01882
818	0.02532
820	0.0225
822	0.01801
824	0.01866
826	0.02272
828	0.02691
830	0.02493
832	0.01564
834	0.00712
836	0.01208
838	0.01865
840	0.01304
842	0.00167
844	-0.01285
846	-0.05333
848	-0.12218
850	-0.20022
852	-0.28624
854	-0.37728
856	-0.46008
858	-0.52435
860	-0.57811
862	-0.62136
864	-0.64637
866	-0.6455
868	-0.62031
870	-0.58615
872	-0.54251
874	-0.49244
876	-0.4358
878	-0.37486
880	-0.31604
882	-0.26823
884	-0.23537
886	-0.20822
888	-0.18119
890	-0.16145
892	-0.13976
894	-0.1172
896	-0.10066
898	-0.08608
900	-0.06836
902	-0.05513
904	-0.05036
906	-0.04709
908	-0.04333
910	-0.0376
912	-0.02357
914	-0.01064
916	-0.01014
918	-0.01461
920	-0.00964
922	-0.00348
924	-0.00492
926	-0.00146
928	0.000874203
930	-0.00191
932	-0.00389
934	-0.00208
936	0.00388
938	0.01257
940	0.01349
942	0.01287
944	0.01418
946	0.01942
948	0.01976
950	0.01451
952	0.01155
954	0.0086
956	0.00769
958	0.00988
960	0.01681
962	0.02786
964	0.02862
966	0.02572
968	0.01794
970	0.00795
972	0.0038
974	0.00666
976	0.01327
978	0.02102
980	0.02858
982	0.03066
984	0.02805
986	0.02493
988	0.01954
990	0.0114
992	0.00795
994	0.00572
996	0.00597
998	0.00944
1000	0.01154
1002	0.01001
1004	0.0071
1006	0.00628
1008	0.01286
1010	0.01912
1012	0.02
1014	0.0195
1016	0.02114
1018	0.026
1020	0.02721
1022	0.0245
1024	0.01371
1026	0.00413
1028	0.00148
1030	0.00393
1032	0.00691
1034	0.01185
1036	0.01433
1038	0.01192
1040	0.01053
1042	0.01454
1044	0.01258
1046	0.00598
1048	0.01061
1050	0.01859
1052	0.01263
1054	0.005
1056	0.00699
1058	0.0067
1060	0.00083907
1062	-0.00185
1064	-0.0014
1066	0.0017
1068	0.00438
1070	0.00314
1072	0.00178
1074	0.00917
1076	0.01743
1078	0.01793
1080	0.01296
1082	0.01149
1084	0.01074
1086	0.00379
1088	0.00235
1090	0.00766
1092	0.00698
1094	0.00207
1096	0.0056
1098	0.01158
1100	0.00513
1102	-0.00252
1104	-0.00368
1106	0.01048
1108	0.02681
1110	0.01578
1112	-0.000139982
1114	0.00306
1116	0.00428
1118	0.00323
1120	0.0027
1122	-0.000476552
1124	-0.00425
1126	-0.00381
1128	-0.00159
1130	-0.0023
1132	-0.005
1134	-0.00641
1136	-0.00471
1138	-0.00294
1140	-0.000273108
1142	0.00858
1144	0.01446
1146	0.01529
1148	0.01133
1150	0.00188
1152	-0.000583145
1154	0.000134682
1156	-0.000606491
1158	-0.000600664
1160	0.00133
1162	0.00591
1164	0.01483
1166	0.02164
1168	0.0237
1170	0.01859
1172	0.00768
1174	0.00399
1176	0.0085
1178	0.00613
1180	0.00233
1182	-0.000472938
1184	-0.00255
1186	-0.000745694
1188	0.00156
1190	0.00222
1192	0.00348
1194	0.00234
1196	0.00538
1198	0.00916
1200	0.01067
1202	0.01006
1204	0.00105
1206	-0.02633
1208	-0.07745
1210	-0.13995
1212	-0.19682
1214	-0.30259
1216	-0.59039
1218	-0.79356
1220	-0.80928
1222	-0.80881
1224	-0.78322
1226	-0.69881
1228	-0.59982
1230	-0.51956
1232	-0.4569
1234	-0.40337
1236	-0.3547
1238	-0.30465
1240	-0.25951
1242	-0.2193
1244	-0.18736
1246	-0.16149
1248	-0.13759
1250	-0.12443
1252	-0.11017
1254	-0.09473
1256	-0.07558
1258	-0.05695
1260	-0.04674
1262	-0.03507
1264	-0.0218
1266	-0.0172
1268	-0.0135
1270	-0.00641
1272	-0.00281
1274	0.00104
1276	0.00434
1278	0.00551
1280	0.00782
1282	0.01554
1284	0.02568
1286	0.02663
1288	0.01793
1290	0.01626
1292	0.02058
1294	0.02279
1296	0.02324
1298	0.02532
1300	0.02754
1302	0.02499
1304	0.02485
1306	0.02535
1308	0.02636
1310	0.0315
1312	0.04081
1314	0.04832
1316	0.04868
1318	0.03984
1320	0.02884
1322	0.02409
1324	0.02285
1326	0.02373
1328	0.02609
1330	0.02795
1332	0.02979
1334	0.03429
1336	0.03894
1338	0.03468
1340	0.032
1342	0.03493
1344	0.04275
1346	0.04501
1348	0.04216
1350	0.03875
1352	0.02792
1354	0.01786
1356	0.01296
1358	0.01266
1360	0.01853
1362	0.03033
1364	0.03517
1366	0.02963
1368	0.02476
1370	0.02834
1372	0.03464
1374	0.03412
1376	0.02683
1378	0.02982
1380	0.03216
1382	0.02493
1384	0.01971
1386	0.02232
1388	0.02495
1390	0.03265
1392	0.04124
1394	0.03904
1396	0.03351
1398	0.0302
1400	0.02816
1402	0.02528
1404	0.01781
1406	0.00827
1408	0.00455
1410	0.00463
1412	0.00661
1414	0.00982
1416	0.01149
1418	0.01716
1420	0.02321
1422	0.01996
1424	0.01564
1426	0.01685
1428	0.02387
1430	0.02646
1432	0.01763
1434	0.01459
1436	0.01595
1438	0.01845
1440	0.02185
1442	0.02856
1444	0.0265
1446	0.01786
1448	0.01671
1450	0.02561
1452	0.03279
1454	0.02973
1456	0.0263
1458	0.02657
1460	0.02549
1462	0.02527
1464	0.02525
1466	0.02609
1468	0.02723
1470	0.02366
1472	0.01541
1474	0.00843
1476	0.00815
1478	0.02
1480	0.02953
1482	0.02135
1484	0.01036
1486	0.00747
1488	0.00781
1490	0.00665
1492	0.00756
1494	0.0133
1496	0.01266
1498	0.01321
1500	0.01737
1502	0.01825
1504	0.01441
1506	0.01434
1508	0.0177
1510	0.01904
1512	0.01371
1514	0.00732
1516	0.00898
1518	0.01651
1520	0.02201
1522	0.0246
1524	0.0262
1526	0.0241
1528	0.0202
1530	0.00945
1532	0.00152
1534	-0.0014
1536	-0.00216
1538	-0.00282
1540	-0.00212
1542	0.00202
1544	0.00427
1546	0.00382
1548	0.00238
1550	0.00347
1552	0.00432
1554	0.00454
1556	0.00389
1558	0.0036
1560	0.00466
1562	0.00659
1564	-0.00511
1566	-0.04952
1568	-0.09935
1570	-0.12758
1572	-0.15543
1574	-0.19528
1576	-0.23826
1578	-0.28893
1580	-0.34553
1582	-0.39096
1584	-0.4056
1586	-0.38826
1588	-0.36061
1590	-0.32724
1592	-0.29153
1594	-0.26153
1596	-0.23271
1598	-0.20194
1600	-0.17389
1602	-0.14655
1604	-0.12578
1606	-0.10635
1608	-0.08887
1610	-0.06698
1612	-0.04298
1614	-0.02528
1616	-0.01791
1618	-0.01328
1620	-0.0014
1622	0.00835
1624	0.00342
1626	-0.00666
1628	-0.0057
1630	0.0061
1632	0.0167
1634	0.0165
1636	0.01369
1638	0.0189
1640	0.01791
1642	0.01287
1644	0.01441
1646	0.01596
1648	0.01584
1650	0.01649
1652	0.01312
1654	0.01404
1656	0.01741
1658	0.02806
1660	0.03696
1662	0.03907
1664	0.0305
1666	0.02278
1668	0.01877
1670	0.02197
1672	0.02503
1674	0.02573
1676	0.02612
1678	0.03003
1680	0.03797
1682	0.04069
1684	0.03778
1686	0.02934
1688	0.01781
1690	0.01294
1692	0.01162
1694	0.01251
1696	0.015
1698	0.02241
1700	0.02817
1702	0.02533
1704	0.01737
1706	0.0149
1708	0.01699
1710	0.0181
1712	0.01923
1714	0.01988
1716	0.01934
1718	0.0197
1720	0.02197
1722	0.02258
1724	0.02488
1726	0.02969
1728	0.03223
1730	0.03027
1732	0.02169
1734	0.01556
1736	0.01489
1738	0.0176
1740	0.02494
1742	0.03038
1744	0.02614
1746	0.01707
1748	0.01181
1750	0.00989
1752	0.01129
1754	0.01904
1756	0.0237
1758	0.02307
1760	0.02714
1762	0.02711
1764	0.01827
1766	0.01046
1768	0.00635
1770	0.00538
1772	0.00657
1774	0.00786
1776	0.00741
1778	0.00846
1780	0.01402
1782	0.01991
1784	0.02467
1786	0.02713
1788	0.02511
1790	0.02142
1792	0.01754
1794	0.01687
1796	0.01732
1798	0.01515
1800	0.01373
1802	0.01354
1804	0.0132
1806	0.00833
1808	0.00388
1810	0.0012
1812	0.00445
1814	0.01808
1816	0.02508
1818	0.0197
1820	0.00681
1822	0.00188
1824	0.00516
1826	0.01148
1828	0.01424
1830	0.01222
1832	0.00141
1834	-0.00425
1836	-0.000467872
1838	0.00696
1840	0.01353
1842	0.01732
1844	0.0218
1846	0.02836
1848	0.03202
1850	0.02732
1852	0.01692
1854	0.0079
1856	-0.00322
1858	-0.01432
1860	-0.01592
1862	-0.01418
1864	-0.01076
1866	-0.00725
1868	-0.00557
1870	-0.00178
1872	0.0012
1874	0.00389
1876	0.01142
1878	0.00839
1880	0.00427
1882	0.00784
1884	0.0116
1886	0.01306
1888	0.00822
1890	0.00153
1892	0.00017415
1894	0.00711
1896	0.01236
1898	0.00878
1900	0.00234
1902	-0.000227728
1904	0.00105
1906	0.00203
1908	0.00743
1910	0.00769
1912	0.00548
1914	0.00886
1916	0.01433
1918	0.01442
1920	0.01019
1922	0.00628
1924	-0.0064
1926	-0.04922
1928	-0.10108
1930	-0.13038
1932	-0.15166
1934	-0.18351
1936	-0.21666
1938	-0.24721
1940	-0.27578
1942	-0.2959
1944	-0.30343
1946	-0.30384
1948	-0.29331
1950	-0.26573
1952	-0.23315
1954	-0.21136
1956	-0.19524
1958	-0.17337
1960	-0.14274
1962	-0.11635
1964	-0.10126
1966	-0.08993
1968	-0.07741
1970	-0.0633
1972	-0.04867
1974	-0.03092
1976	-0.01297
1978	-0.00209
1980	0.00209
1982	0.00128
1984	-0.00489
1986	-0.0082
1988	-0.00842
1990	-0.00724
1992	-0.00485
1994	0.00165
1996	0.01179
1998	0.02204
2000	0.02467
2002	0.02014
2004	0.01174
2006	0.00725
2008	0.01205
2010	0.02416
2012	0.03142
2014	0.03183
2016	0.02624
2018	0.02125
2020	0.01588
2022	0.01355
2024	0.01526
2026	0.01537
2028	0.01738
2030	0.02032
2032	0.02098
2034	0.02631
2036	0.02732
2038	0.02498
2040	0.021
2042	0.01361
2044	0.0118
2046	0.01383
2048	0.02079
2050	0.02742
2052	0.0339
2054	0.02849
2056	0.01939
2058	0.01363
2060	0.01194
2062	0.0159
2064	0.01581
2066	0.0124
2068	0.01403
2070	0.01269
2072	0.00858
2074	0.0142
2076	0.0161
2078	0.01653
2080	0.0201
2082	0.01487
2084	0.00778
2086	0.00446
2088	0.00505
2090	0.00497
2092	0.00691
2094	0.00948
2096	0.01053
2098	0.0173
2100	0.02625
2102	0.02551
2104	0.0198
2106	0.01692
2108	0.01105
2110	0.00845
2112	0.01415
2114	0.01802
2116	0.01179
2118	-0.00137
2120	-0.00524
2122	0.00338
2124	0.01362
2126	0.01816
2128	0.01008
2130	0.000186979
2132	-0.00442
2134	-0.00367
2136	0.000746651
2138	0.00316
2140	0.00422
2142	0.00348
2144	0.00575
2146	0.00611
2148	0.00765
2150	0.00994
2152	0.01536
2154	0.01968
2156	0.01352
2158	0.00801
2160	0.00955
2162	0.01576
2164	0.0147
2166	0.00993
2168	0.00664
2170	0.00545
2172	0.00492
2174	0.00434
2176	0.00331
2178	0.00619
2180	0.01182
2182	0.01867
2184	0.01768
2186	0.01403
2188	0.01232
2190	0.01582
2192	0.01973
2194	0.02316
2196	0.02549
2198	0.02202
2200	0.01264
2202	0.0043
2204	-1.23962e-05
2206	0.0024
2208	0.00968
2210	0.01478
2212	0.01377
2214	0.00556
2216	-0.00243
2218	0.00195
2220	0.01014
2222	0.01032
2224	0.00894
2226	0.01176
2228	0.01058
2230	0.004
2232	0.00105
2234	-0.000958762
2236	-0.00432
2238	-0.000230996
2240	0.01276
2242	0.01561
2244	0.01198
2246	0.00467
2248	-0.00319
2250	-0.00578
2252	-0.00491
2254	-0.00131
2256	0.00887
2258	0.0136
2260	0.00727
2262	0.000848603
2264	0.00343
2266	0.00331
2268	-0.000816748
2270	-0.00158
2272	0.00515
2274	0.01269
2276	0.01423
2278	0.00799
2280	-0.00434
2282	-0.0113
2284	-0.02442
2286	-0.05854
2288	-0.0929
2290	-0.10889
2292	-0.11723
2294	-0.13279
2296	-0.15923
2298	-0.19128
2300	-0.21737
2302	-0.24021
2304	-0.25894
2306	-0.25748
2308	-0.2379
2310	-0.21409
2312	-0.19167
2314	-0.16902
2316	-0.14914
2318	-0.12664
2320	-0.10335
2322	-0.08556
2324	-0.07202
2326	-0.05762
2328	-0.03711
2330	-0.01735
2332	-0.00321
2334	0.000529624
2336	-0.00599
2338	-0.01024
2340	-0.01022
2342	-0.00679
2344	-0.00305
2346	0.00165
2348	0.00524
2350	0.00776
2352	0.01225
2354	0.01498
2356	0.01659
2358	0.02123
2360	0.02306
2362	0.02169
2364	0.02623
2366	0.0318
2368	0.02732
2370	0.02364
2372	0.02366
2374	0.02439
2376	0.02384
2378	0.02568
2380	0.03079
2382	0.03527
2384	0.0302
2386	0.01725
2388	0.01688
2390	0.02769
2392	0.03136
2394	0.02495
2396	0.0182
2398	0.01462
2400	0.01829
2402	0.02261
2404	0.02466
2406	0.01696
2408	0.00713
2410	0.00148
2412	-0.000107695
2414	0.00269
2416	0.01126
2418	0.01915
2420	0.01527
2422	0.00813
2424	0.00496
2426	0.00887
2428	0.01779
2430	0.02421
2432	0.02641
2434	0.02078
2436	0.01355
2438	0.02014
2440	0.0283
2442	0.02496
2444	0.00917
2446	-0.00118
2448	0.000212324
2450	0.00362
2452	0.00622
2454	0.00893
2456	0.00936
2458	0.00783
2460	0.0094
2462	0.01253
2464	0.01292
2466	0.00955
2468	0.0102
2470	0.0142
2472	0.01513
2474	0.01411
2476	0.01805
2478	0.02344
2480	0.02374
2482	0.01957
2484	0.0154
2486	0.00909
2488	0.00125
2490	0.00238
2492	0.00314
2494	-0.00325
2496	-0.0036
2498	-0.00302
2500	0.000166352
2502	2.53534e-05
2504	-0.000434645
2506	0.00707
2508	0.01615
2510	0.01415
2512	0.00593
2514	0.00411
2516	0.01093
2518	0.01255
2520	0.00867
2522	0.00627
2524	0.00811
2526	0.01255
2528	0.01488
2530	0.01586
2532	0.01494
2534	0.00795
2536	0.000368372
2538	-0.000906627
2540	0.0033
2542	0.01091
2544	0.01632
2546	0.0164
2548	0.01252
2550	0.00758
2552	0.00457
2554	0.0021
2556	0.00629
2558	0.01299
2560	0.00837
2562	-0.000773614
2564	-0.00284
2566	-0.0012
2568	0.000786389
2570	0.00437
2572	0.00838
2574	0.01263
2576	0.01111
2578	0.0115
2580	0.01231
2582	0.01052
2584	0.00451
2586	0.00164
2588	1.04339e-05
2590	-0.00459
2592	-0.00739
2594	-0.00695
2596	-0.00528
2598	-0.00302
2600	-0.000545297
2602	0.00399
2604	0.00971
2606	0.0104
2608	0.00397
2610	-0.00289
2612	-0.00861
2614	-0.00929
2616	-0.0055
2618	0.0055
2620	0.01449
2622	0.01714
2624	0.01823
2626	0.01404
2628	0.00405
2630	-0.00303
2632	-0.00364
2634	-0.00366
2636	-0.00474
2638	-0.00238
2640	5.17207e-05
2642	0.000658402
2644	-0.009
2646	-0.03455
2648	-0.05138
2650	-0.07011
2652	-0.09607
2654	-0.12092
2656	-0.13816
2658	-0.15449
2660	-0.1721
2662	-0.18872
2664	-0.19615
2666	-0.18891
2668	-0.17127
2670	-0.15256
2672	-0.13441
2674	-0.11348
2676	-0.09176
2678	-0.0732
2680	-0.05725
2682	-0.04042
2684	-0.02369
2686	-0.01274
2688	-0.00465
2690	0.00891
2692	0.01772
2694	0.02104
2696	0.02655
2698	0.03163
2700	0.03132
2702	0.03016
2704	0.0345
2706	0.03554
2708	0.03152
2710	0.02891
2712	0.03176
2714	0.03377
2716	0.03483
2718	0.03649
2720	0.03462
2722	0.03473
2724	0.03621
2726	0.03323
2728	0.02329
2730	0.01493
2732	0.01525
2734	0.02072
2736	0.02213
2738	0.0248
2740	0.03376
2742	0.03752
2744	0.03681
2746	0.03409
2748	0.03491
2750	0.03459
2752	0.02915
2754	0.02233
2756	0.01683
2758	0.01479
2760	0.01391
2762	0.01391
2764	0.01896
2766	0.02567
2768	0.0295
2770	0.02958
2772	0.03021
2774	0.02951
2776	0.02396
2778	0.01849
2780	0.0157
2782	0.01322
2784	0.00988
2786	0.01172
2788	0.01507
2790	0.01545
2792	0.01349
2794	0.01084
2796	0.01278
2798	0.01393
2800	0.01671
2802	0.01806
2804	0.01874
2806	0.01809
2808	0.01838
2810	0.02027
2812	0.02185
2814	0.01981
2816	0.01953
2818	0.0232
2820	0.0276
2822	0.03183
2824	0.03259
2826	0.02526
2828	0.01672
2830	0.01074
2832	0.0069
2834	0.00783
2836	0.01458
2838	0.02472
2840	0.0329
2842	0.02992
2844	0.01554
2846	0.00456
2848	0.00891
2850	0.01974
2852	0.02764
2854	0.02159
2856	0.00739
2858	-0.000532253
2860	-0.00129
2862	0.00816
2864	0.01883
2866	0.01619
2868	0.00758
2870	0.00351
2872	0.00334
2874	0.00545
2876	0.00673
2878	0.01117
2880	0.02161
2882	0.02048
2884	0.01159
2886	-0.000395316
2888	-0.00317
2890	0.000957246
2892	0.0025
2894	6.80837e-06
2896	0.00079609
2898	0.00374
2900	0.00762
2902	0.01069
2904	0.01149
2906	0.01203
2908	0.01408
2910	0.01688
2912	0.0175
2914	0.01155
2916	0.00446
2918	0.00484
2920	0.01295
2922	0.01024
2924	0.00062656
2926	0.00157
2928	0.01632
2930	0.02626
2932	0.02625
2934	0.02251
2936	0.01598
2938	0.01805
2940	0.02148
2942	0.01553
2944	0.00412
2946	0.00404
2948	0.00993
2950	0.01229
2952	0.01355
2954	0.01566
2956	0.01208
2958	0.01249
2960	0.01334
2962	0.00947
2964	0.00233
2966	-0.000884242
2968	0.00214
2970	0.00781
2972	0.00641
2974	-0.00269
2976	-0.00303
2978	-0.00284
2980	-0.00443
2982	-0.00497
2984	-0.00287
2986	0.00268
2988	0.00833
2990	0.00748
2992	0.00256
2994	-0.00031664
2996	0.00243
2998	0.00392
3000	0.00307
3002	0.00287
3004	-0.000331979
3006	-0.01891
3008	-0.04074
3010	-0.06086
3012	-0.08702
3014	-0.11229
3016	-0.12807
3018	-0.14061
3020	-0.15265
3022	-0.15983
3024	-0.15932
3026	-0.14575
3028	-0.13131
3030	-0.12009
3032	-0.10522
3034	-0.08599
3036	-0.06726
3038	-0.05521
3040	-0.04469
3042	-0.0368
3044	-0.02235
3046	-0.00622
3048	0.00547
3050	0.0163
3052	0.02158
3054	0.02005
3056	0.02119
3058	0.02309
3060	0.02725
3062	0.03029
3064	0.0306
3066	0.03195
3068	0.03818
3070	0.04384
3072	0.04059
3074	0.03328
3076	0.02989
3078	0.03602
3080	0.04722
3082	0.04955
3084	0.0419
3086	0.0383
3088	0.04
3090	0.03603
3092	0.02523
3094	0.01854
3096	0.01924
3098	0.02808
3100	0.03721
3102	0.03908
3104	0.03206
3106	0.0222
3108	0.02372
3110	0.03275
3112	0.03377
3114	0.02279
3116	0.01634
3118	0.02062
3120	0.02654
3122	0.02757
3124	0.019
3126	0.0131
3128	0.01326
3130	0.02282
3132	0.03083
3134	0.02822
3136	0.01781
3138	0.01419
3140	0.02029
3142	0.02467
3144	0.02752
3146	0.02492
3148	0.01943
3150	0.01671
3152	0.01817
3154	0.01968
3156	0.02038
3158	0.02078
3160	0.0222
3162	0.02309
3164	0.02252
3166	0.02859
3168	0.03906
3170	0.04384
3172	0.03584
3174	0.0219
3176	0.01076
3178	0.01118
3180	0.01529
3182	0.01597
3184	0.01368
3186	0.01436
3188	0.01836
3190	0.02399
3192	0.02349
3194	0.01445
3196	0.00708
3198	0.00461
3200	0.00477
3202	0.00823
3204	0.01827
3206	0.02599
3208	0.02596
3210	0.02252
3212	0.01617
3214	0.01133
3216	0.00906
3218	0.00904
3220	0.00742
3222	0.00761
3224	0.00779
3226	0.00706
3228	0.00886
3230	0.01671
3232	0.02608
3234	0.02963
3236	0.01845
3238	0.00987
3240	0.01353
3242	0.01587
3244	0.01257
3246	0.01624
3248	0.02057
3250	0.01525
3252	0.01344
3254	0.00605
3256	0.000895042
3258	-0.00139
3260	0.00123
3262	0.00615
3264	0.00881
3266	0.01124
3268	0.0096
3270	0.00935
3272	0.01002
3274	0.01097
3276	0.00884
3278	0.00695
3280	0.00401
3282	0.00153
3284	0.00127
3286	0.00384
3288	0.00646
3290	0.00749
3292	0.0098
3294	0.01334
3296	0.01042
3298	0.01259
3300	0.01513
3302	0.01814
3304	0.02279
3306	0.02215
3308	0.0138
3310	0.0108
3312	0.01024
3314	0.00769
3316	0.00846
3318	0.00153
3320	-0.00363
3322	-0.00293
3324	0.0048
3326	0.01283
3328	0.01009
3330	0.002
3332	-0.00219
3334	-0.00096964
3336	0.000333724
3338	0.00125
3340	0.00161
3342	0.00316
3344	0.0047
3346	0.00614
3348	0.00414
3350	0.00249
3352	0.00101
3354	-0.000586526
3356	-0.000597401
3358	6.17227e-05
3360	0.00118
3362	0.00267
3364	0.00123
3366	-0.01379
3368	-0.04324
3370	-0.06685
3372	-0.0751
3374	-0.0833
3376	-0.09318
3378	-0.10757
3380	-0.12123
3382	-0.12923
3384	-0.13273
3386	-0.1252
3388	-0.1114
3390	-0.09643
3392	-0.08305
3394	-0.07478
3396	-0.06388
3398	-0.04682
3400	-0.03238
3402	-0.02537
3404	-0.0148
3406	0.00122
3408	0.01576
3410	0.02258
3412	0.01959
3414	0.01613
3416	0.0176
3418	0.02265
3420	0.0338
3422	0.04324
3424	0.04428
3426	0.03771
3428	0.03454
3430	0.03958
3432	0.04318
3434	0.04213
3436	0.03768
3438	0.03797
3440	0.03785
3442	0.0368
3444	0.03549
3446	0.03649
3448	0.03809
3450	0.03705
3452	0.03332
3454	0.02626
3456	0.0156
3458	0.00697
3460	0.01146
3462	0.02186
3464	0.02852
3466	0.03206
3468	0.03099
3470	0.02296
3472	0.01332
3474	0.01172
3476	0.0179
3478	0.02675
3480	0.0309
3482	0.03381
3484	0.03958
3486	0.04008
3488	0.03753
3490	0.0349
3492	0.03191
3494	0.02726
3496	0.01619
3498	0.0061
3500	0.00267
3502	0.0045
3504	0.01477
3506	0.02694
3508	0.03281
3510	0.03073
3512	0.02717
3514	0.02521
3516	0.02114
3518	0.01927
3520	0.01533
3522	0.01631
3524	0.01555
3526	0.0079
3528	0.00269
3530	0.00304
3532	0.00967
3534	0.01723
3536	0.01979
3538	0.01564
3540	0.01029
3542	0.00613
3544	0.00272
3546	0.00384
3548	0.01281
3550	0.02298
3552	0.0258
3554	0.02208
3556	0.01937
3558	0.01703
3560	0.01342
3562	0.01046
3564	0.00659
3566	0.000687532
3568	-0.000699501
3570	0.000500466
3572	0.000746433
3574	0.00116
3576	0.00271
3578	0.00669
3580	0.01151
3582	0.01518
3584	0.01534
3586	0.01128
3588	0.0098
3590	0.01455
3592	0.01199
3594	0.00198
3596	-0.00333
3598	-0.00193
3600	0.00368
3602	0.01163
3604	0.01391
3606	0.0125
3608	0.00813
3610	0.0017
3612	-0.00186
3614	-0.00155
3616	-0.00199
3618	-0.00279
3620	-0.00201
3622	0.00298
3624	0.0093
3626	0.01495
3628	0.01481
3630	0.01084
3632	0.00527
3634	0.000282405
3636	-0.00302
3638	-0.00256
3640	-0.00487
3642	-0.00736
3644	-0.0066
3646	-0.0048
3648	0.000118173
3650	0.0074
3652	0.01462
3654	0.01828
3656	0.0169
3658	0.01266
3660	0.00211
3662	0.00086594
3664	0.00952
3666	0.0122
3668	0.00815
3670	0.00517
3672	0.00615
3674	0.00659
3676	0.000498708
3678	-0.01109
3680	-0.01861
3682	-0.01826
3684	-0.01627
3686	-0.01231
3688	-0.00482
3690	-0.000760517
3692	-0.00398
3694	-0.00438
3696	0.00325
3698	0.00802
3700	0.01001
3702	0.00644
3704	-0.00268
3706	-0.00541
3708	-0.00392
3710	-0.00503
3712	-0.0089
3714	-0.01142
3716	-0.00715
3718	-0.000325894
3720	0.00321
3722	-0.00208
3724	-0.01045
3726	-0.02968
3728	-0.05731
3730	-0.07779
3732	-0.08815
3734	-0.09079
3736	-0.08989
3738	-0.09681
3740	-0.10605
3742	-0.11658
3744	-0.11947
3746	-0.10465
3748	-0.08336
3750	-0.06805
3752	-0.05884
3754	-0.05072
3756	-0.03859
3758	-0.01939
3760	-0.0094
3762	-0.00344
3764	0.00638
3766	0.01082
3768	0.01361
3770	0.02163
3772	0.02857
3774	0.03608
3776	0.03583
3778	0.03006
3780	0.02449
3782	0.0213
3784	0.02035
3786	0.02439
3788	0.02733
3790	0.02991
3792	0.03124
3794	0.03053
3796	0.03077
3798	0.0322
3800	0.03485
3802	0.03406
3804	0.03353
3806	0.03365
3808	0.03607
3810	0.04218
3812	0.05055
3814	0.05153
3816	0.04301
3818	0.03668
3820	0.02803
3822	0.02343
3824	0.02264
3826	0.02213
3828	0.02206
3830	0.02183
3832	0.02368
3834	0.02429
3836	0.02717
3838	0.03316
3840	0.03511
3842	0.03498
3844	0.03702
3846	0.04155
3848	0.03925
3850	0.02948
3852	0.02089
3854	0.01633
3856	0.01098
3858	0.01146
3860	0.01836
3862	0.02583
3864	0.02828
3866	0.02543
3868	0.02096
3870	0.02718
3872	0.03188
3874	0.02504
3876	0.01815
3878	0.01279
3880	0.00791
3882	0.01036
3884	0.01809
3886	0.02107
3888	0.01278
3890	0.0023
3892	-0.0036
3894	-0.00282
3896	0.00305
3898	0.00943
3900	0.01337
3902	0.01709
3904	0.027
3906	0.02785
3908	0.01649
3910	0.01289
3912	0.01365
3914	0.01499
3916	0.01091
3918	0.00908
3920	0.01293
3922	0.01526
3924	0.01489
3926	0.01047
3928	0.00801
3930	0.00918
3932	0.00272
3934	-0.00237
3936	0.00611
3938	0.00752
3940	0.00531
3942	0.00614
3944	0.00904
3946	0.00328
3948	-0.00245
3950	0.0017
3952	0.01464
3954	0.0141
3956	0.01449
3958	0.01503
3960	0.00934
3962	0.00383
3964	-0.000918517
3966	-0.00627
3968	-0.00365
3970	0.00047195
3972	-0.00211
3974	-0.00478
3976	-0.00439
3978	-0.00286
3980	0.00111
3982	0.000820885
3984	-0.00387
3986	-0.0047
3988	0.0036
3990	0.01603
3992	0.01884
3994	0.01012
3996	0.01479
3998	0.02029
[truncated: 3,102 more rows]

## Sheet: Figure 2B Integrated heat 
Molar Ratio	kcal per mole of injection
0.00916
0.19312	-7.71441
0.37834	-3.96417
0.56481	-3.36623
0.75255	-1.79905
0.94154	-1.52232
1.13179	-0.446606
1.32331	-0.804309
1.51608	-0.93992
1.71011	0.527231
1.9054	-0.319831
2.10195	0.531014
2.29976	-0.0330576
2.49883	0.31917
2.69916	-0.587963
2.90075	-0.499089
3.1036	0.0922429
3.30771	-0.472994
3.51307	-0.27915
3.7197	0.137331
3.92758	-0.0996332
4.13673	-0.230033
4.34713	0.42179
4.5588	0.472499
4.77172	0.232899
4.98591	-0.16936
5.20135	0.117629
5.41805	0.136601

## Sheet: Figure 2C ThT assay (salt)
	Selction buffer			Selction buffer (no Mg2+, no Ca2+)			Selction buffer (no Ca2+)			Selction buffer (no Mg2+)			PBS
0	1	0.997453	0.993646	0.948463	1	0.995545	0.95463	0.997336	0.996856	0.994363	1	0.994726	0.993846	1.08464	0.985366
0.5	0.972189	0.988097	0.949393	0.98926	0.882019	0.898985	0.878144	0.938706	0.927835	0.927011	0.958658	0.947396	0.973482	0.989453	0.989746
1	0.873035	0.900521	0.905008	0.857165	0.829955	0.837353	0.69766	0.877391	0.784555	0.947613	0.948246	0.938467	0.941459	0.977446	0.968356
2	0.801052	0.86817	0.8479	0.799051	0.726845	0.796734	0.647718	0.810895	0.786533	0.806612	0.86235	0.835185	0.870124	0.904646	0.916385
3	0.644832	0.657542	0.640616	0.748797	0.678088	0.729473	0.581225	0.722414	0.683346	0.65601	0.717924	0.683246	0.845958	0.878275	0.854136
5	0.46477	0.472144	0.482441	0.739159	0.618951	0.669736	0.546276	0.514784	0.533755	0.517928	0.568235	0.538526	0.726864	0.836927	0.797435
7	0.38082	0.407124	0.39029	0.650807	0.663575	0.636453	0.467772	0.472949	0.478135	0.437634	0.479235	0.482637	0.576732	0.680274	0.628452
10	0.332041	0.293338	0.294027	0.558396	0.499218	0.491355	0.431967	0.394975	0.418457	0.394047	0.41932	0.393546	0.438432	0.507846	0.527418
12	0.306677	0.267384	0.25359	0.471184	0.463952	0.468363	0.36744	0.355978	0.368397	0.351895	0.375325	0.362974	0.402062	0.47696	0.438391
15	0.2899	0.260945	0.275303	0.395221	0.437834	0.394636	0.33236	0.334467	0.338557	0.308344	0.327952	0.319372	0.276301	0.357936	0.312354
20	0.245353	0.257815	0.245192	0.371409	0.375959	0.378603	0.300853	0.279485	0.294856	0.273292	0.28683	0.286846	0.3028	0.308462	0.301474
25	0.248128	0.241688	0.248497	0.352594	0.354226	0.358647	0.271473	0.264952	0.268453	0.275156	0.286382	0.272524	0.270038	0.289637	0.286863

## Sheet: Figure 2D ThT(selectivity)
	Blank			Atropine			Timolol Maleate			Ibuprofen			Uric acid			Quinine			Metronidazole			Sulfaclozine			Histidine			Tryptophan
	Set 1	Set 2	Set 3	Set 1	Set 2	Set 3	Set 1	Set 2	Set 3	Set 1	Set 2	Set 3	Set 1	Set 2	Set 3	Set 1	Set 2	Set 3	Set 1	Set 2	Set 3	Set 1	Set 2	Set 3	Set 1	Set 2	Set 3	Set 1	Set 2	Set 3
F/F0	1	0.999847	0.97684	0.316206	0.254683	0.24846	1.01625	0.98948	0.98246	0.871863	0.907328	0.91848	1.03394	0.998468	0.986124	0.976487	0.988946	0.98134	0.924539	0.934684	0.958647	0.967917	0.858974	0.926481	1.17985	0.9946	0.984685	0.984135	0.982487	0.983184

## Sheet: Figure 4A ThT assay 
Target (μM)	Set 1	Set 2	Set 3
0	1	1	1
0.5	1.03092	1.04665	1.13653
1	1.06873	1.02607	1.10816
5	0.980078	0.947521	0.974288
7	0.8654	0.901793	0.813636
10	0.76584	0.699342	0.764578
15	0.659398	0.554663	0.564315
20	0.463333	0.428396	0.54545
25	0.482365	0.491499	0.541351
30	0.560363	0.463114	0.423367
35	0.50468	0.4468	0.406486
40	0.512156	0.426486	0.416483
50	0.48976	0.40646	0.42684
80	0.42648	0.36486	0.409431
100	0.374348	0.36846	0.345685

## Sheet: Figure 4A LOD
Target (μM)	Set 1	Set 2	Set 3
0	1	1	1
0.5	1.03092	1.04665	1.13653
1	1.06873	1.02607	1.10816
2	1.11144	1.04313	1.10718
3	1.09352	0.927854	1.09398
5	0.980078	0.947521	0.974288
7	0.8654	0.901793	0.813636
10	0.76584	0.699342	0.764578

## Sheet: Figure 4B Thermogram
Time (Second)	μcal/sec
2	-0.02028
4	-0.01921
6	-0.01764
8	-0.01614
10	-0.01611
12	-0.01684
14	-0.01725
16	-0.01824
18	-0.01895
20	-0.02018
22	-0.02097
24	-0.02124
26	-0.02083
28	-0.02079
30	-0.02059
32	-0.01947
34	-0.01912
36	-0.01934
38	-0.02117
40	-0.02171
42	-0.02287
44	-0.0235
46	-0.02378
48	-0.02303
50	-0.02313
52	-0.02296
54	-0.02335
56	-0.02265
58	-0.02183
60	-0.02275
62	-0.02445
64	-0.02676
66	-0.02697
68	-0.02601
70	-0.02421
72	-0.02224
74	-0.02171
76	-0.01968
78	-0.0169
80	-0.01479
82	-0.01173
84	-0.00948
86	-0.00611
88	-0.000978713
90	0.00545
92	0.01151
94	0.01563
96	0.01774
98	0.01854
100	0.01772
102	0.01671
104	0.01667
106	0.01415
108	0.01159
110	0.00936
112	0.00717
114	0.005
116	0.00286
118	0.0023
120	0.00167
122	-3.02296e-05
124	-0.00459
126	-0.0118
128	-0.02039
130	-0.02989
132	-0.03695
134	-0.0398
136	-0.03938
138	-0.03946
140	-0.03708
142	-0.03401
144	-0.03068
146	-0.02866
148	-0.02588
150	-0.02275
152	-0.02208
154	-0.02007
156	-0.01824
158	-0.01672
160	-0.01636
162	-0.01662
164	-0.01559
166	-0.01497
168	-0.01435
170	-0.01392
172	-0.01325
174	-0.01208
176	-0.01197
178	-0.01177
180	-0.01096
182	-0.01155
184	-0.01366
186	-0.02009
188	-0.02492
190	-0.02814
192	-0.02771
194	-0.0258
196	-0.02303
198	-0.02127
200	-0.01839
202	-0.01454
204	-0.01113
206	-0.0085
208	-0.00522
210	-0.00203
212	-0.00177
214	-0.00269
216	-0.00104
218	0.000623489
220	0.0008784
222	0.000954311
224	0.000519222
226	-9.38676e-05
228	-0.000779957
230	0.000513954
232	0.000553865
234	0.00147
236	0.00177
238	0.00221
240	0.00292
242	0.0031
244	0.00384
246	0.00305
248	0.00296
250	0.00241
252	0.00126
254	0.00102
256	-0.000129206
258	0.00115
260	0.00236
262	0.0016
264	0.00205
266	0.00361
268	0.00264
270	0.00177
272	0.00209
274	0.00109
276	0.00175
278	0.00157
280	0.00126
282	0.000516635
284	-0.000496454
286	-0.00132
288	-0.00151
290	-0.00202
292	-0.00139
294	-0.0009749
296	2.10106e-05
298	0.000687921
300	0.000639832
302	0.00113
304	0.00173
306	0.0022
308	0.002
310	0.00152
312	0.000622297
314	0.000716208
316	0.000696119
318	0.000512029
320	0.00034394
322	0.00131
324	0.00211
326	0.00116
328	0.00126
330	0.000801494
332	0.000454405
334	0.000405316
336	0.000167227
338	-0.000676862
340	-0.00144
342	-0.00165
344	-0.00246
346	-0.00429
348	-0.00471
350	-0.00477
352	-0.0047
354	-0.00497
356	-0.00585
358	-0.00694
360	-0.01191
362	-0.01674
364	-0.02314
366	-0.03114
368	-0.03754
370	-0.04084
372	-0.04138
374	-0.04234
376	-0.0423
378	-0.04023
380	-0.03625
382	-0.03162
384	-0.02777
386	-0.02352
388	-0.02038
390	-0.01618
392	-0.01414
394	-0.01149
396	-0.00956
398	-0.0078
400	-0.00594
402	-0.00327
404	-0.00259
406	-0.00261
408	-0.00189
410	-0.002
412	-0.000911163
414	-0.000366252
416	0.000313659
418	0.00032657
420	-0.000888519
422	-0.000541609
424	-0.000444698
426	0.000141213
428	0.000441124
430	-0.000893965
432	-0.00138
434	-0.000508349
436	-0.000826392
438	-0.000599434
440	-0.00105
442	-0.000941519
444	-0.00159
446	-0.00132
448	-0.000649646
450	-0.00138
452	-0.00177
454	-0.00166
456	-0.00195
458	-0.00254
460	-0.0029
462	-0.00355
464	-0.00245
466	-0.00176
468	-0.00065807
470	-0.000262112
472	-0.00131
474	-0.00232
476	-0.00263
478	-0.0021
480	-0.0025
482	-0.00318
484	-0.00671
486	-0.02125
488	-0.06999
490	-0.14792
492	-0.24158
494	-0.33878
496	-0.43165
498	-0.52129
500	-0.59332
502	-0.64933
504	-0.69115
506	-0.71739
508	-0.72814
510	-0.72068
512	-0.69483
514	-0.65531
516	-0.60787
518	-0.55681
520	-0.5048
522	-0.45343
524	-0.40574
526	-0.36269
528	-0.32232
530	-0.28574
532	-0.25425
534	-0.2245
536	-0.1977
538	-0.17349
540	-0.15306
542	-0.13772
544	-0.12163
546	-0.10901
548	-0.0969
550	-0.08628
552	-0.07801
554	-0.07114
556	-0.06595
558	-0.06017
560	-0.05483
562	-0.04997
564	-0.04469
566	-0.03992
568	-0.03707
570	-0.03428
572	-0.02998
574	-0.02703
576	-0.02494
578	-0.02383
580	-0.02278
582	-0.02336
584	-0.02401
586	-0.0233
588	-0.02358
590	-0.02336
592	-0.02237
594	-0.02129
596	-0.0191
598	-0.01827
600	-0.01719
602	-0.01486
604	-0.0139
606	-0.01339
608	-0.01324
610	-0.01347
612	-0.01424
614	-0.01445
616	-0.01386
618	-0.01523
620	-0.0163
622	-0.0171
624	-0.01678
626	-0.01678
628	-0.01689
630	-0.01783
632	-0.01777
634	-0.01887
636	-0.01994
638	-0.01935
640	-0.0209
642	-0.02108
644	-0.02127
646	-0.02053
648	-0.01866
650	-0.01846
652	-0.01817
654	-0.01766
656	-0.01696
658	-0.01667
660	-0.01638
662	-0.0162
664	-0.01673
666	-0.01716
668	-0.01743
670	-0.01749
672	-0.01812
674	-0.01949
676	-0.01993
678	-0.01995
680	-0.0191
682	-0.01981
684	-0.02171
686	-0.02061
688	-0.02161
690	-0.02205
692	-0.02208
694	-0.02284
696	-0.02253
698	-0.02334
700	-0.02329
702	-0.0235
704	-0.024
706	-0.02479
708	-0.02538
710	-0.02493
712	-0.02408
714	-0.02445
716	-0.02458
718	-0.02604
720	-0.02689
722	-0.02665
724	-0.02633
726	-0.02621
728	-0.02556
730	-0.02728
732	-0.02735
734	-0.02674
736	-0.02581
738	-0.02468
740	-0.02468
742	-0.02488
744	-0.02517
746	-0.02546
748	-0.02641
750	-0.02697
752	-0.02867
754	-0.02808
756	-0.02817
758	-0.02817
760	-0.02893
762	-0.02969
764	-0.03005
766	-0.0329
768	-0.03706
770	-0.04095
772	-0.04159
774	-0.04086
776	-0.03997
778	-0.03718
780	-0.03238
782	-0.02879
784	-0.02606
786	-0.02413
788	-0.02417
790	-0.02453
792	-0.02417
794	-0.0225
796	-0.01815
798	-0.0103
800	-0.00228
802	0.00397
804	0.00765
806	0.01145
808	0.01106
810	0.00879
812	0.00441
814	-0.00149
816	-0.0047
818	-0.00296
820	-0.00105
822	-0.00112
824	-0.000486044
826	0.000357376
828	0.000897796
830	-0.000191784
832	-0.000395363
834	-0.00151
836	-0.00128
838	-0.00208
840	-0.00294
842	-0.00322
844	-0.00742
846	-0.02316
848	-0.05903
850	-0.10774
852	-0.17134
854	-0.24299
856	-0.31573
858	-0.38361
860	-0.44279
862	-0.46821
864	-0.44971
866	-0.41905
868	-0.39379
870	-0.37402
872	-0.35164
874	-0.32778
876	-0.30233
878	-0.27646
880	-0.25396
882	-0.23355
884	-0.21327
886	-0.19477
888	-0.18062
890	-0.16851
892	-0.15349
894	-0.13701
896	-0.12362
898	-0.11311
900	-0.10432
902	-0.09755
904	-0.09141
906	-0.08516
908	-0.08018
910	-0.07201
912	-0.06218
914	-0.05474
916	-0.04756
918	-0.04385
920	-0.03807
922	-0.03007
924	-0.02782
926	-0.03017
928	-0.03317
930	-0.03107
932	-0.02673
934	-0.02233
936	-0.01813
938	-0.01348
940	-0.01213
942	-0.01388
944	-0.01496
946	-0.0148
948	-0.0112
950	-0.01032
952	-0.01104
954	-0.00784
956	-0.00512
958	-0.00271
960	0.000858856
962	0.00437
964	0.00236
966	7.67203e-05
968	-0.00136
970	-0.00461
972	-0.00389
974	-0.00248
976	-0.000172507
978	0.00192
980	0.00276
982	0.00239
984	0.0047
986	0.00369
988	0.00216
990	0.00167
992	0.00205
994	0.00214
996	0.00342
998	0.00478
1000	0.00284
1002	0.00233
1004	0.00627
1006	0.00644
1008	0.00148
1010	-0.000627278
1012	0.000192677
1014	-0.000497369
1016	0.0023
1018	0.00629
1020	0.00998
1022	0.00793
1024	0.00425
1026	0.0014
1028	-0.000493687
1030	0.00197
1032	0.00102
1034	0.00152
1036	0.00281
1038	0.00451
1040	0.0062
1042	0.00332
1044	0.0033
1046	0.00335
1048	0.00173
1050	0.00172
1052	0.00374
1054	0.00592
1056	0.00454
1058	0.00196
1060	0.000174587
1062	-0.00317
1064	-0.00374
1066	-0.00422
1068	-0.00549
1070	-0.00213
1072	0.00358
1074	0.00914
1076	0.01066
1078	0.00861
1080	0.00426
1082	0.000183088
1084	-0.00152
1086	-0.00577
1088	-0.01039
1090	-0.01381
1092	-0.0142
1094	-0.01187
1096	-0.00996
1098	-0.00953
1100	-0.01036
1102	-0.00712
1104	-0.00448
1106	-0.00322
1108	-0.00256
1110	-0.00213
1112	-0.000881593
1114	-0.000199638
1116	-0.000854683
1118	0.000386889
1120	0.000702065
1122	0.0018
1124	0.00187
1126	0.000886591
1128	0.000172767
1130	-0.002
1132	-0.00214
1134	0.00111
1136	0.0048
1138	0.00557
1140	0.00393
1142	0.00404
1144	0.00488
1146	0.00603
1148	0.00553
1150	0.00368
1152	0.00326
1154	0.00246
1156	-0.000433776
1158	-0.000847601
1160	0.00136
1162	0.00122
1164	0.000618183
1166	0.00136
1168	0.00183
1170	0.00382
1172	0.00724
1174	0.00789
1176	0.00289
1178	-0.00504
1180	-0.00734
1182	-0.00699
1184	-0.00709
1186	-0.00615
1188	-0.00309
1190	-0.000118806
1192	0.00197
1194	0.00321
1196	0.00519
1198	0.00572
1200	0.00218
1202	-0.00127
1204	-0.01833
1206	-0.05303
1208	-0.09829
1210	-0.14039
1212	-0.18318
1214	-0.22529
1216	-0.26433
1218	-0.29855
1220	-0.32869
1222	-0.35363
1224	-0.36673
1226	-0.36133
1228	-0.34573
1230	-0.32723
1232	-0.30691
1234	-0.28539
1236	-0.26206
1238	-0.24096
1240	-0.22005
1242	-0.20011
1244	-0.18026
1246	-0.16402
1248	-0.15142
1250	-0.14075
1252	-0.13187
1254	-0.1214
1256	-0.112
1258	-0.1008
1260	-0.091
1262	-0.08234
1264	-0.07545
1266	-0.06958
1268	-0.06317
1270	-0.05637
1272	-0.05069
1274	-0.04674
1276	-0.04286
1278	-0.03982
1280	-0.03635
1282	-0.03484
1284	-0.03431
1286	-0.02988
1288	-0.02724
1290	-0.02383
1292	-0.02175
1294	-0.02032
1296	-0.01869
1298	-0.0159
1300	-0.01409
1302	-0.01359
1304	-0.01218
1306	-0.00961
1308	-0.00894
1310	-0.00817
1312	-0.0067
1314	-0.0045
1316	-0.0024
1318	-0.000884758
1320	0.000628667
1322	0.00144
1324	0.00149
1326	0.00239
1328	0.00347
1330	0.00565
1332	0.00522
1334	0.00584
1336	0.00584
1338	0.00432
1340	0.00581
1342	0.0067
1344	0.00609
1346	0.00564
1348	0.00563
1350	0.00586
1352	0.00603
1354	0.00641
1356	0.00702
1358	0.00564
1360	0.00508
1362	0.00407
1364	0.00262
1366	0.00188
1368	0.00129
1370	0.000300284
1372	-0.000173291
1374	-0.00129
1376	-0.0011
1378	-0.000164017
1380	0.00139
1382	0.00189
1384	0.00197
1386	0.00151
1388	0.000887107
1390	0.00168
1392	0.00113
1394	0.00143
1396	0.00178
1398	0.0017
1400	0.0018
1402	0.00227
1404	0.00229
1406	0.00231
1408	0.00338
1410	0.00276
1412	0.00279
1414	0.002
1416	0.00252
1418	0.00377
1420	0.00296
1422	0.00186
1424	0.00173
1426	0.000860176
1428	0.00126
1430	0.000704025
1432	0.0012
1434	0.000241875
1436	0.0006963
1438	0.00101
1440	0.00233
1442	0.00301
1444	0.00106
1446	0.000246423
1448	-5.21522e-05
1450	-0.000304728
1452	-0.000582303
1454	3.81219e-05
1456	0.000251547
1458	-0.000624029
1460	2.48513e-06
1462	0.000473451
1464	-0.000434583
1466	-5.8617e-05
1468	0.000269349
1470	0.0019
1472	0.000791281
1474	0.000122247
1476	0.000146213
1478	0.000693179
1480	0.00103
1482	0.000769111
1484	0.00106
1486	0.00293
1488	0.00437
1490	0.0037
1492	0.0022
1494	0.00103
1496	0.000541872
1498	0.000125838
1500	0.00102
1502	0.00070177
1504	0.00061516
1506	-0.000410451
1508	0.000196939
1510	-0.000474672
1512	0.00122
1514	0.00317
1516	0.00214
1518	0.000826886
1520	0.000344276
1522	0.000664665
1524	0.000288055
1526	0.000686444
1528	0.000291834
1530	-0.00115
1532	-0.00101
1534	-0.00138
1536	0.000663392
1538	0.000302781
1540	-0.000385829
1542	0.00087256
1544	0.00089395
1546	0.000818591
1548	-0.000926329
1550	-2.72493e-05
1552	-0.000884169
1554	-0.00033909
1556	0.00056399
1558	0.00027707
1560	0.00094715
1562	-0.00047277
1564	-0.00802
1566	-0.03095
1568	-0.06979
1570	-0.11126
1572	-0.14758
1574	-0.1755
1576	-0.19651
1578	-0.21097
1580	-0.21979
1582	-0.22613
1584	-0.2215
1586	-0.19504
1588	-0.16453
1590	-0.14176
1592	-0.12507
1594	-0.11221
1596	-0.10111
1598	-0.09147
1600	-0.08004
1602	-0.07045
1604	-0.06209
1606	-0.05456
1608	-0.04938
1610	-0.04365
1612	-0.03913
1614	-0.0348
1616	-0.03097
1618	-0.02895
1620	-0.02752
1622	-0.02575
1624	-0.02344
1626	-0.02227
1628	-0.02116
1630	-0.01994
1632	-0.01866
1634	-0.0184
1636	-0.01844
1638	-0.0159
1640	-0.01319
1642	-0.01309
1644	-0.01254
1646	-0.01268
1648	-0.0108
1650	-0.00893
1652	-0.00989
1654	-0.01022
1656	-0.0112
1658	-0.01204
1660	-0.01225
1662	-0.01138
1664	-0.01188
1666	-0.01107
1668	-0.00797
1670	-0.00608
1672	-0.00684
1674	-0.00731
1676	-0.00497
1678	-0.00235
1680	-0.00278
1682	-0.00244
1684	-0.00276
1686	-0.00283
1688	-0.00146
1690	-0.000814253
1692	0.0011
1694	0.00443
1696	0.0049
1698	0.00257
1700	0.000394537
1702	-5.05056e-05
1704	-0.000144548
1706	-0.00103
1708	-0.00189
1710	-0.00165
1712	0.000430284
1714	0.00143
1716	-0.00191
1718	-0.01081
1720	-0.01863
1722	-0.02325
1724	-0.02522
1726	-0.02557
1728	-0.02443
1730	-0.021
1732	-0.01473
1734	-0.00903
1736	-0.00584
1738	-0.00256
1740	0.000350694
1742	0.00262
1744	0.00441
1746	0.00533
1748	0.00477
1750	0.00491
1752	0.00567
1754	0.00672
1756	0.0059
1758	0.00792
1760	0.00849
1762	0.00786
1764	0.00805
1766	0.00946
1768	0.00875
1770	0.00656
1772	0.00467
1774	0.00347
1776	0.00152
1778	0.000756893
1780	-0.00098415
1782	-0.00179
1784	-0.00292
1786	-0.00315
1788	-0.00433
1790	-0.0029
1792	-0.00232
1794	-0.00176
1796	-0.00192
1798	0.000125471
1800	-0.000476571
1802	-9.86132e-05
1804	4.23447e-05
1806	-0.000395697
1808	0.00061226
1810	0.00101
1812	0.00189
1814	0.00222
1816	0.00184
1818	0.00247
1820	0.00349
1822	0.00243
1824	-7.60768e-05
1826	-0.00317
1828	-0.00553
1830	-0.00581
1832	-0.00567
1834	-0.00454
1836	-0.00266
1838	-0.00194
1840	-0.00113
1842	-0.000339456
1844	0.000428502
1846	0.00020446
1848	-0.000308583
1850	-0.000238625
1852	-0.00123
1854	-0.000627709
1856	-0.00226
1858	-0.00138
1860	-0.00118
1862	-0.00168
1864	-0.0017
1866	-0.00211
1868	0.000183996
1870	0.000588954
1872	-0.00158
1874	-0.00322
1876	-0.00242
1878	-0.00196
1880	-0.000991257
1882	-0.00393
1884	-0.00353
1886	-0.00274
1888	-0.00199
1890	-0.00157
1892	-0.00025251
1894	-0.000391086
1896	-0.000482661
1898	-0.000685237
1900	-0.00122
1902	-0.00189
1904	-0.00276
1906	-0.00448
1908	-0.00585
1910	-0.00661
1912	-0.00592
1914	-0.00528
1916	-0.00568
1918	-0.00602
1920	-0.00477
1922	-0.00455
1924	-0.01072
1926	0.00149
1928	0.03497
1930	0.06348
1932	0.02256
1934	-0.14182
1936	-0.30787
1938	-0.38862
1940	-0.40242
1942	-0.36756
1944	-0.29884
1946	-0.23114
1948	-0.18242
1950	-0.14746
1952	-0.1198
1954	-0.0968
1956	-0.0789
1958	-0.06599
1960	-0.058
1962	-0.05067
1964	-0.04522
1966	-0.03884
1968	-0.0321
1970	-0.02682
1972	-0.02305
1974	-0.0206
1976	-0.01716
1978	-0.01528
1980	-0.0143
1982	-0.01252
1984	-0.01123
1986	-0.00849
1988	-0.00618
1990	-0.00482
1992	-0.00482
1994	-0.00557
1996	-0.00478
1998	-0.00467
2000	-0.0037
2002	-0.00429
2004	-0.00378
2006	-0.00316
2008	-0.00348
2010	-0.0048
2012	-0.00536
2014	-0.00499
2016	-0.00292
2018	-0.00218
2020	-0.000670426
2022	-0.000187837
2024	0.0019
2026	0.0037
2028	0.00377
2030	0.00582
2032	0.00675
2034	0.00811
2036	0.00935
2038	0.0099
2040	0.01041
2042	0.00976
2044	0.0099
2046	0.00861
2048	0.00725
2050	0.00673
2052	0.0066
2054	0.00691
2056	0.00667
2058	0.00687
2060	0.00681
2062	0.00753
2064	0.00745
2066	0.00782
2068	0.00756
2070	0.00532
2072	0.00212
2074	0.0018
2076	0.00112
2078	-0.000212333
2080	-0.00356
2082	-0.01008
2084	-0.01603
2086	-0.01812
2088	-0.01711
2090	-0.0143
2092	-0.00807
2094	-0.0024
2096	0.00151
2098	0.00515
2100	0.0084
2102	0.00997
2104	0.01012
2106	0.00973
2108	0.01096
2110	0.01124
2112	0.01053
2114	0.01054
2116	0.01086
2118	0.00979
2120	0.00998
2122	0.00856
2124	0.00755
2126	0.00824
2128	0.00696
2130	0.00634
2132	0.00641
2134	0.00584
2136	0.00614
2138	0.00648
2140	0.0047
2142	0.00413
2144	0.00254
2146	0.0027
2148	0.00242
2150	0.00253
2152	0.00211
2154	0.00169
2156	0.00184
2158	0.00115
2160	0.000998832
2162	0.00187
2164	0.000699011
2166	-0.002
2168	-0.00402
2170	-0.00505
2172	-0.00513
2174	-0.00353
2176	-0.00257
2178	-0.00199
2180	-0.00146
2182	-0.00145
2184	-0.000983095
2186	-0.000828506
2188	0.000224084
2190	0.00192
2192	0.00306
2194	0.00256
2196	0.00162
2198	-0.000758969
2200	-0.00684
2202	-0.01402
2204	-0.0185
2206	-0.01945
2208	-0.01773
2210	-0.01552
2212	-0.01178
2214	-0.00856
2216	-0.00741
2218	-0.00429
2220	-0.00134
2222	0.000465104
2224	0.001
2226	-0.00275
2228	-0.00707
2230	-0.00824
2232	-0.00627
2234	-0.00425
2236	-0.00142
2238	0.000730737
2240	0.00254
2242	0.00402
2244	0.00396
2246	0.00441
2248	0.00579
2250	0.00608
2252	0.006
2254	0.00368
2256	0.000890226
2258	-0.00306
2260	-0.00616
2262	-0.00657
2264	-0.00486
2266	-0.00254
2268	-0.000250448
2270	0.00235
2272	0.003
2274	0.00324
2276	0.00354
2278	0.00294
2280	0.00348
2282	0.00342
2284	0.000470847
2286	-0.01852
2288	-0.04873
2290	-0.07584
2292	-0.09083
2294	-0.09794
2296	-0.10011
2298	-0.1007
2300	-0.09889
2302	-0.09625
2304	-0.09062
2306	-0.07748
2308	-0.06009
2310	-0.04798
2312	-0.04114
2314	-0.04134
2316	-0.04233
2318	-0.041
2320	-0.03766
2322	-0.03539
2324	-0.03206
2326	-0.02913
2328	-0.02672
2330	-0.02195
2332	-0.01591
2334	-0.01
2336	-0.00422
2338	-0.00030813
2340	0.00332
2342	0.00592
2344	0.0071
2346	0.00844
2348	0.01111
2350	0.0117
2352	0.01011
2354	0.01134
2356	0.01326
2358	0.01369
2360	0.01337
2362	0.01336
2364	0.01381
2366	0.0126
2368	0.011
2370	0.01081
2372	0.01129
2374	0.01124
2376	0.0104
2378	0.0098
2380	0.00951
2382	0.00863
2384	0.00798
2386	0.00657
2388	0.00693
2390	0.00617
2392	0.00483
2394	0.00483
2396	0.00096409
2398	-0.00465
2400	-0.01031
2402	-0.01538
2404	-0.01816
2406	-0.01914
2408	-0.01936
2410	-0.01799
2412	-0.01379
2414	-0.00647
2416	-0.00196
2418	0.00329
2420	0.00734
2422	0.00883
2424	0.00977
2426	0.01131
2428	0.01076
2430	0.01037
2432	0.01048
2434	0.00958
2436	0.00824
2438	0.00756
2440	0.00621
2442	0.0063
2444	0.00623
2446	0.00688
2448	0.00667
2450	0.00615
2452	0.00579
2454	0.00557
2456	0.00629
2458	0.00546
2460	0.00472
2462	0.00481
2464	0.00514
2466	0.00665
2468	0.00611
2470	0.00616
2472	0.00722
2474	0.00724
2476	0.00718
2478	0.00755
2480	0.00781
2482	0.00605
2484	0.00605
2486	0.00631
2488	0.00587
2490	0.00425
2492	0.00368
2494	0.00455
2496	0.0037
2498	0.00376
2500	0.00482
2502	0.00602
2504	0.00564
2506	0.00691
2508	0.00654
2510	0.00543
2512	0.0046
2514	0.00456
2516	0.00479
2518	0.00426
2520	0.0049
2522	0.00528
2524	0.00597
2526	0.00466
2528	0.00568
2530	0.0053
2532	0.00574
2534	0.00612
2536	0.00695
2538	0.0055
2540	0.00418
2542	0.000711621
2544	-0.00421
2546	-0.00953
2548	-0.01433
2550	-0.01581
2552	-0.01392
2554	-0.01267
2556	-0.01129
2558	-0.00919
2560	-0.0059
2562	-0.00346
2564	-0.00279
2566	-0.00323
2568	0.000132551
2570	0.00183
2572	0.00243
2574	0.00266
2576	0.00179
2578	0.00268
2580	0.0041
2582	0.00421
2584	0.00416
2586	0.00406
2588	0.00301
2590	0.00345
2592	0.00302
2594	0.00287
2596	0.00278
2598	0.00236
2600	0.00102
2602	0.00112
2604	0.000877244
2606	0.000959218
2608	-0.000176808
2610	-0.00188
2612	-0.0013
2614	-0.000405885
2616	0.00012309
2618	-0.00122
2620	-0.00164
2622	-0.00202
2624	-0.00437
2626	-0.00522
2628	-0.00232
2630	0.00148
2632	0.00337
2634	0.00446
2636	0.00544
2638	0.00619
2640	0.00709
2642	0.00938
2644	0.00537
2646	-0.01306
2648	-0.03675
2650	-0.05542
2652	-0.06659
2654	-0.07317
2656	-0.07608
2658	-0.07666
2660	-0.07635
2662	-0.07358
2664	-0.06623
2666	-0.05057
2668	-0.0328
2670	-0.02157
2672	-0.01337
2674	-0.00763
2676	-0.0027
2678	0.000430378
2680	0.0014
2682	0.00215
2684	0.00237
2686	0.00168
2688	-0.00375
2690	-0.01354
2692	-0.02163
2694	-0.02627
2696	-0.02727
2698	-0.02653
2700	-0.02543
2702	-0.02346
2704	-0.02108
2706	-0.01811
2708	-0.01551
2710	-0.01389
2712	-0.01085
2714	-0.00904
2716	-0.00643
2718	-0.00531
2720	-0.00495
2722	-0.00376
2724	-0.00252
2726	-0.000835424
2728	-0.00142
2730	-0.00196
2732	-0.00275
2734	-0.000595897
2736	-0.000211266
2738	-0.00217
2740	-0.00255
2742	-0.00295
2744	-0.0033
2746	-0.00438
2748	-0.00264
2750	-0.00219
2752	-0.00135
2754	-0.00192
2756	-0.00504
2758	-0.00855
2760	-0.01137
2762	-0.01305
2764	-0.01319
2766	-0.01338
2768	-0.012
2770	-0.01214
2772	-0.01158
2774	-0.01091
2776	-0.00967
2778	-0.01011
2780	-0.00956
2782	-0.00863
2784	-0.00756
2786	-0.00764
2788	-0.00755
2790	-0.00764
2792	-0.00572
2794	-0.00466
2796	-0.00541
2798	-0.00529
2800	-0.00569
2802	-0.0046
2804	-0.00424
2806	-0.00399
2808	-0.00331
2810	-0.00214
2812	-0.00152
2814	-0.000237629
2816	0.000479003
2818	0.00207
2820	0.00235
2822	0.00136
2824	0.00090753
2826	0.00227
2828	0.00236
2830	0.0017
2832	0.00151
2834	0.00165
2836	0.00149
2838	0.00119
2840	-0.00169
2842	-0.00556
2844	-0.00737
2846	-0.00959
2848	-0.01112
2850	-0.01002
2852	-0.0088
2854	-0.00825
2856	-0.00828
2858	-0.00734
2860	-0.00701
2862	-0.00763
2864	-0.00733
2866	-0.00826
2868	-0.00813
2870	-0.0074
2872	-0.00509
2874	-0.00427
2876	-0.00411
2878	-0.00267
2880	-0.0013
2882	-0.000531151
2884	-0.000832519
2886	-5.18871e-05
2888	0.00106
2890	0.000836376
2892	0.000143008
2894	0.00079564
2896	0.000562271
2898	0.00121
2900	0.00138
2902	0.00122
2904	0.0019
2906	0.00208
2908	0.00219
2910	0.00163
2912	0.00145
2914	0.000555957
2916	0.000648589
2918	-0.00113
2920	-0.00759
2922	-0.01515
2924	-0.01992
2926	-0.02134
2928	-0.02095
2930	-0.01977
2932	-0.01625
2934	-0.01238
2936	-0.00788
2938	-0.00522
2940	-0.00232
2942	-0.000624964
2944	0.000649119
2946	0.00185
2948	0.0013
2950	-0.00173
2952	-0.00821
2954	-0.01381
2956	-0.01641
2958	-0.01677
2960	-0.01675
2962	-0.01582
2964	-0.01372
2966	-0.01191
2968	-0.01068
2970	-0.00893
2972	-0.00716
2974	-0.00513
2976	-0.00263
2978	-0.00157
2980	-0.000954812
2982	-0.00142
2984	-0.000396084
2986	0.00037478
2988	0.000184643
2990	1.05074e-05
2992	-0.000989629
2994	-0.00206
2996	-0.000888901
2998	-0.000705037
3000	-0.00255
3002	-0.0023
3004	-0.006
3006	-0.02244
3008	-0.04329
3010	-0.05822
3012	-0.06146
3014	-0.06108
3016	-0.05896
3018	-0.05824
3020	-0.05798
3022	-0.05981
3024	-0.05885
3026	-0.04926
3028	-0.03689
3030	-0.0305
3032	-0.02855
3034	-0.02731
3036	-0.02629
3038	-0.0238
3040	-0.01994
3042	-0.01681
3044	-0.01476
3046	-0.01302
3048	-0.01214
3050	-0.00866
3052	-0.00666
3054	-0.00493
3056	-0.0035
3058	-0.00316
3060	-0.00347
3062	-0.00327
3064	-0.00337
3066	-0.00339
3068	-0.00337
3070	-0.0035
3072	-0.00426
3074	-0.00605
3076	-0.00956
3078	-0.01466
3080	-0.02014
3082	-0.02319
3084	-0.0232
3086	-0.02377
3088	-0.02267
3090	-0.02239
3092	-0.02099
3094	-0.01979
3096	-0.01743
3098	-0.01652
3100	-0.01568
3102	-0.01481
3104	-0.01485
3106	-0.0129
3108	-0.01061
3110	-0.01021
3112	-0.00898
3114	-0.00696
3116	-0.00719
3118	-0.00702
3120	-0.00595
3122	-0.00633
3124	-0.00636
3126	-0.00555
3128	-0.00632
3130	-0.0063
3132	-0.0058
3134	-0.00579
3136	-0.00553
3138	-0.00564
3140	-0.00445
3142	-0.00505
3144	-0.00596
3146	-0.00662
3148	-0.00665
3150	-0.00761
3152	-0.00831
3154	-0.00905
3156	-0.00918
3158	-0.00955
3160	-0.00897
3162	-0.00993
3164	-0.0098
3166	-0.0084
3168	-0.00837
3170	-0.0091
3172	-0.00975
3174	-0.00953
3176	-0.00939
3178	-0.01059
3180	-0.01451
3182	-0.01897
3184	-0.0211
3186	-0.02124
3188	-0.02016
3190	-0.01937
3192	-0.0184
3194	-0.01754
3196	-0.01654
3198	-0.01557
3200	-0.01655
3202	-0.01736
3204	-0.01817
3206	-0.02062
3208	-0.02148
3210	-0.02046
3212	-0.01894
3214	-0.01887
3216	-0.01702
3218	-0.01478
3220	-0.01214
3222	-0.00938
3224	-0.00691
3226	-0.00256
3228	-0.00136
3230	-0.00178
3232	-0.00125
3234	-0.00101
3236	-0.00104
3238	0.0011
3240	0.00168
3242	0.000798637
3244	0.000845111
3246	-0.0013
3248	-0.00181
3250	-0.00365
3252	-0.00265
3254	-0.00345
3256	-0.00508
3258	-0.00487
3260	-0.00489
3262	-0.00386
3264	-0.00423
3266	-0.00306
3268	-0.00211
3270	8.07688e-06
3272	0.000448989
3274	0.00192
3276	0.00183
3278	0.000554726
3280	-8.43618e-05
3282	0.00011255
3284	0.000903463
3286	0.000852375
3288	0.000850287
3290	0.00108
3292	0.00154
3294	0.00244
3296	0.00182
3298	0.00146
3300	0.00229
3302	0.0021
3304	0.00236
3306	0.00248
3308	0.00152
3310	0.00262
3312	0.00296
3314	0.00387
3316	0.00394
3318	0.00386
3320	0.00414
3322	0.0037
3324	0.0032
3326	0.00382
3328	0.00403
3330	0.00501
3332	0.00633
3334	0.00692
3336	0.00702
3338	0.00529
3340	0.00154
3342	-0.00482
3344	-0.00909
3346	-0.01078
3348	-0.0121
3350	-0.0114
3352	-0.00853
3354	-0.00709
3356	-0.0043
3358	-0.00188
3360	0.00122
3362	0.00492
3364	0.00428
3366	-0.00978
3368	-0.031
3370	-0.04495
3372	-0.04958
3374	-0.05131
3376	-0.05043
3378	-0.04897
3380	-0.04884
3382	-0.04677
3384	-0.04258
3386	-0.0314
3388	-0.01494
3390	-0.00143
3392	0.00542
3394	0.00508
3396	0.00107
3398	-0.00237
3400	-0.00242
3402	-0.00124
3404	0.000395638
3406	0.00281
3408	0.00552
3410	0.00894
3412	0.01276
3414	0.01508
3416	0.01778
3418	0.01918
3420	0.02033
3422	0.02092
3424	0.02242
3426	0.02184
3428	0.02242
3430	0.02189
3432	0.02202
3434	0.02121
3436	0.02161
3438	0.02179
3440	0.02114
3442	0.01989
3444	0.01838
3446	0.01715
3448	0.01527
3450	0.01287
3452	0.01191
3454	0.01244
3456	0.01172
3458	0.01136
3460	0.01089
3462	0.01054
3464	0.01001
3466	0.01012
3468	0.01038
3470	0.01112
3472	0.01173
3474	0.0109
3476	0.01132
3478	0.01257
3480	0.01272
3482	0.01392
3484	0.01343
3486	0.0105
3488	0.00626
3490	0.00262
3492	0.00248
3494	0.00507
3496	0.00682
3498	0.00918
3500	0.01145
3502	0.01341
3504	0.01437
3506	0.01472
3508	0.01342
3510	0.01354
3512	0.0125
3514	0.01158
3516	0.01197
3518	0.01306
3520	0.01624
3522	0.01819
3524	0.01872
3526	0.01938
3528	0.01981
3530	0.01956
3532	0.01962
3534	0.01941
3536	0.01805
3538	0.01759
3540	0.01784
3542	0.01589
3544	0.01539
3546	0.01658
3548	0.01497
3550	0.01381
3552	0.01313
3554	0.01217
3556	0.01314
3558	0.01288
3560	0.00966
3562	0.00677
3564	0.00327
3566	0.00227
3568	0.0027
3570	0.00512
3572	0.00653
3574	0.00789
3576	0.00706
3578	0.00656
3580	0.00726
3582	0.00817
3584	0.00801
3586	0.0078
3588	0.00654
3590	0.00746
3592	0.0083
3594	0.00776
3596	0.00719
3598	0.00717
3600	0.00822
3602	0.00751
3604	0.00752
3606	0.00892
3608	0.00971
3610	0.00931
3612	0.00917
3614	0.00902
3616	0.01023
3618	0.01026
3620	0.01087
3622	0.01047
3624	0.01083
3626	0.01021
3628	0.00862
3630	0.00817
3632	0.00752
3634	0.00835
3636	0.00862
3638	0.00931
3640	0.00768
3642	0.00714
3644	0.00647
3646	0.00658
3648	0.00647
3650	0.00618
3652	0.00666
3654	0.00675
3656	0.00706
3658	0.0075
3660	0.00785
3662	0.00621
3664	0.00253
3666	8.88363e-05
3668	2.68319e-05
3670	-0.0014
3672	-0.00307
3674	-0.0028
3676	-0.00179
3678	-0.00064419
3680	0.000746806
3682	0.00251
3684	0.0036
3686	0.00584
3688	0.00674
3690	0.00584
3692	0.00494
3694	0.0057
3696	0.0044
3698	7.96151e-05
3700	-0.00501
3702	-0.00729
3704	-0.00703
3706	-0.00517
3708	-0.00447
3710	-0.00388
3712	-0.00198
3714	-0.00102
3716	-0.00111
3718	-0.00226
3720	-0.00206
3722	-0.00122
3724	-0.00345
3726	-0.0186
3728	-0.04281
3730	-0.0588
3732	-0.06397
3734	-0.06545
3736	-0.0654
3738	-0.06326
3740	-0.06127
3742	-0.05773
3744	-0.05412
3746	-0.04321
3748	-0.02672
3750	-0.01179
3752	-0.00265
3754	0.003
3756	0.00689
3758	0.01021
3760	0.01229
3762	0.01316
3764	0.01358
3766	0.01638
3768	0.01718
3770	0.01616
3772	0.01567
3774	0.0165
3776	0.01504
3778	0.01275
3780	0.01237
3782	0.01261
3784	0.01295
3786	0.01164
3788	0.01129
3790	0.01125
3792	0.01015
3794	0.01026
3796	0.00942
3798	0.00898
3800	0.00869
3802	0.00859
3804	0.0086
3806	0.00949
3808	0.00905
3810	0.00801
3812	0.00916
3814	0.00919
3816	0.00916
3818	0.00843
3820	0.00875
3822	0.00818
3824	0.00794
3826	0.00791
3828	0.00779
3830	0.00686
3832	0.00479
3834	-0.000384897
3836	-0.00517
3838	-0.01061
3840	-0.01328
3842	-0.01388
3844	-0.01282
3846	-0.0113
3848	-0.00823
3850	-0.00646
3852	-0.00385
3854	-0.000465245
3856	0.0013
3858	0.000774686
3860	0.000240151
3862	-0.000584383
3864	-0.00402
3866	-0.0065
3868	-0.00659
3870	-0.00749
3872	-0.00582
3874	-0.00478
3876	-0.00316
3878	-0.00112
3880	-0.00125
3882	0.000114269
3884	0.000870734
3886	0.00114
3888	0.00241
3890	0.00265
3892	0.00234
3894	0.00143
3896	-0.000444474
3898	-0.00224
3900	-0.00321
3902	-0.00248
3904	-0.0026
3906	-0.00305
3908	-0.00325
3910	-0.00313
3912	-0.00191
3914	-0.00129
3916	0.000504178
3918	0.00183
3920	0.00205
3922	0.00301
3924	0.00417
3926	0.00451
3928	0.00387
3930	0.00192
3932	-0.000366099
3934	0.000210366
3936	0.000960831
3938	0.0014
3940	0.000397762
3942	9.12268e-05
3944	0.00127
3946	0.00167
3948	0.00111
3950	0.00166
3952	0.000898553
3954	0.00115
3956	0.000163484
3958	-0.000362051
3960	-0.000755586
3962	-0.00132
3964	-0.000958655
3966	2.80988e-06
3968	-0.000459725
3970	-0.00144
3972	-0.00288
3974	-0.0052
3976	-0.00706
3978	-0.01021
3980	-0.01267
3982	-0.015
3984	-0.01461
3986	-0.01326
3988	-0.01212
3990	-0.01186
3992	-0.01171
3994	-0.00984
3996	-0.00733
3998	-0.00659
[truncated: 3,102 more rows]

## Sheet: Figure 4B Integrated heat
Molar Ratio	kcal per mole of injection
0.28375	-8.5974
0.42361	-6.48892
0.56441	-3.11475
0.70616	-2.71728
0.84885	-1.88382
0.99248	0.158142
1.13706	0.728715
1.28258	0.506195
1.42905	0.853101
1.57646	0.471142
1.72482	-0.315282
1.87412	1.80346
2.02437	0.732263
2.17556	2.65645
2.3277	0.651379
2.48078	1.74797
2.6348	3.14073
2.78977	2.94102
2.94569	1.93814
3.10255	2.23564
3.26035	1.5151
3.4191	0.916084
3.57879	2.48563
3.73943	1.63363
3.90101	2.02463
4.06354	1.79907

[truncated: 7 more sheets: Figure 4C ThT assay (salt), Figure 4D ThT (selectivity), Figure 5A UV-vis calibration , Figure 5B UV-vis atropine level, Figure 5C ThT assay calibration, Figure 5C LOD , Figure 5D ThT(atropine level)  ]
